# Supplementary material
Source: Copernicus journal article supplement (doi:10.5194/egusphere-2026-2474)
Supplement: Supplementary file 1 [file egusphere-2026-2474-supplement.pdf]

1

## **Supplementary Material**

2

### **A Numerical Weather Prediction Model-Based Approach to Assess Fire Weather Conditions over the Northwest Himalayan Forests**

3

4

Anandu Prabhakaran<sup>1</sup>, Piyush Srivastava<sup>1\*</sup>

5

<sup>1</sup>Centre of Excellence in Disaster Mitigation and Management, Indian Institute of Technology Roorkee, Roorkee,  
Uttarakhand, 247667, India

6

7

\*Correspondence to: Piyush Srivastava ([piyush.srivastava@dm.iitr.ac.in](mailto:piyush.srivastava@dm.iitr.ac.in))

8

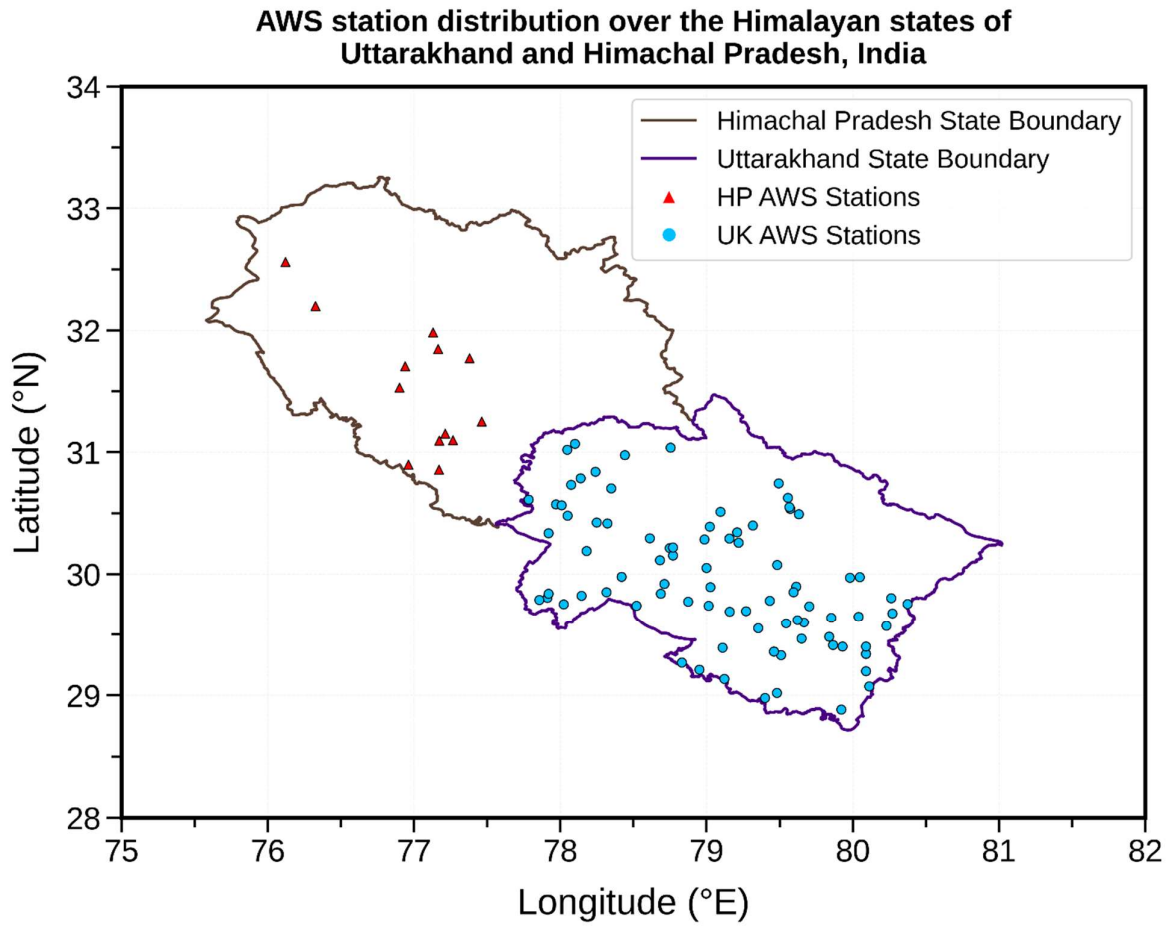

9

10 **Figure S1** This figure represents the spatial distribution of 98 Automated Weather Stations across  
 11 the Indian Himalayan States of Uttarakhand and Himachal Pradesh, India.

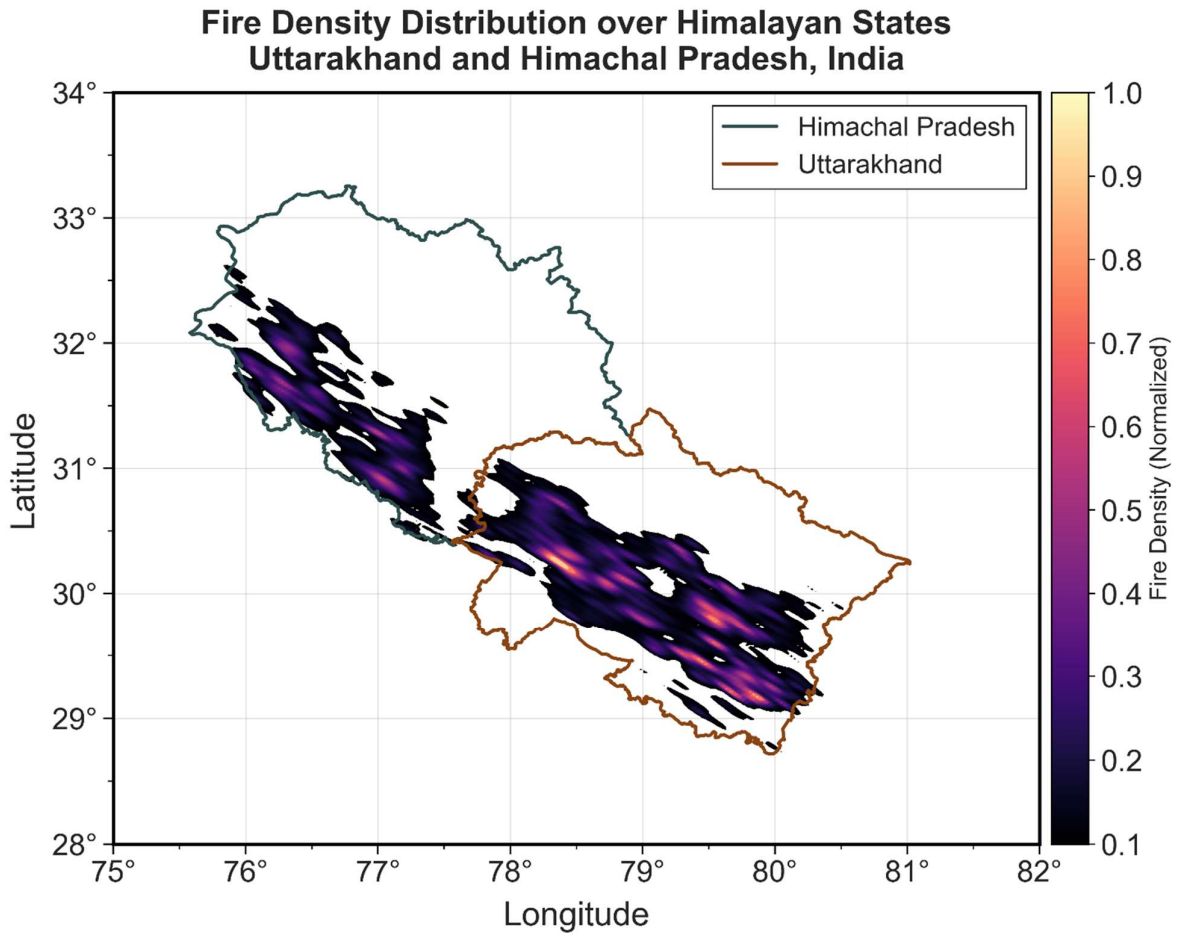

12

13 **Figure S2** The figure shows the variation of fire density across the Himalayan states of Uttarakhand  
 14 (red) and Himachal Pradesh (dark blue), India during 2000 to 2024. The fire alerts from the MODIS  
 15 and SNPP sensors are normalised from 0 to 1.0 with 1 representing the most fire prone region and 0  
 16 representing non fire prone region.

| Point | Latitude (°N) | Longitude (°E) | Fire Date   | Slope Alignment |
|-------|---------------|----------------|-------------|-----------------|
| P01   | 29.0528       | 79.4208        | 21 May 2024 | Southwest       |
| P02   | 30.1447       | 78.8339        | 06 May 2024 | North           |
| P03   | 29.5100       | 79.3008        | 04 May 2024 | West            |
| P04   | 29.0489       | 79.4158        | 09 May 2024 | South           |
| P05   | 30.4108       | 78.3750        | 28 May 2024 | North           |
| P06   | 29.7639       | 79.5658        | 05 May 2024 | North           |
| P07   | 30.3678       | 78.4269        | 28 May 2024 | Northeast       |
| P08   | 29.5028       | 79.3608        | 21 May 2024 | West            |
| P09   | 30.1389       | 78.8147        | 06 May 2024 | Southwest       |
| P10   | 29.6819       | 79.7658        | 06 May 2024 | North           |
| P11   | 29.7728       | 79.6947        | 05 May 2024 | Southeast       |
| P12   | 30.7328       | 78.3597        | 05 May 2024 | Southwest       |
| P13   | 30.2008       | 78.0797        | 19 May 2024 | Southeast       |
| P14   | 30.0769       | 78.7219        | 14 May 2024 | Southwest       |
| P15   | 30.0339       | 78.9639        | 20 May 2024 | North           |
| P16   | 29.9100       | 79.4669        | 06 May 2024 | Southwest       |
| P17   | 31.4442       | 76.5480        | 28 May 2024 | Southeast       |
| P18   | 31.2317       | 76.7503        | 14 May 2024 | North           |
| P19   | 31.4706       | 76.4810        | 14 May 2024 | South           |
| P20   | 31.8617       | 76.0097        | 16 May 2024 | Southwest       |
| P21   | 31.8623       | 76.0350        | 16 May 2024 | Southwest       |
| P22   | 32.0359       | 76.6627        | 19 May 2024 | West            |
| P23   | 32.0364       | 76.6680        | 19 May 2024 | Northeast       |
| P24   | 30.9750       | 77.0639        | 20 May 2024 | Northeast       |

17 **Table S1** This table shows the identified fire clusters along with their location, fire date obtained  
18 from MODIS and SNPP sensors and the alignment of slopes obtained from SRTM Digital Elevation  
19 Model.

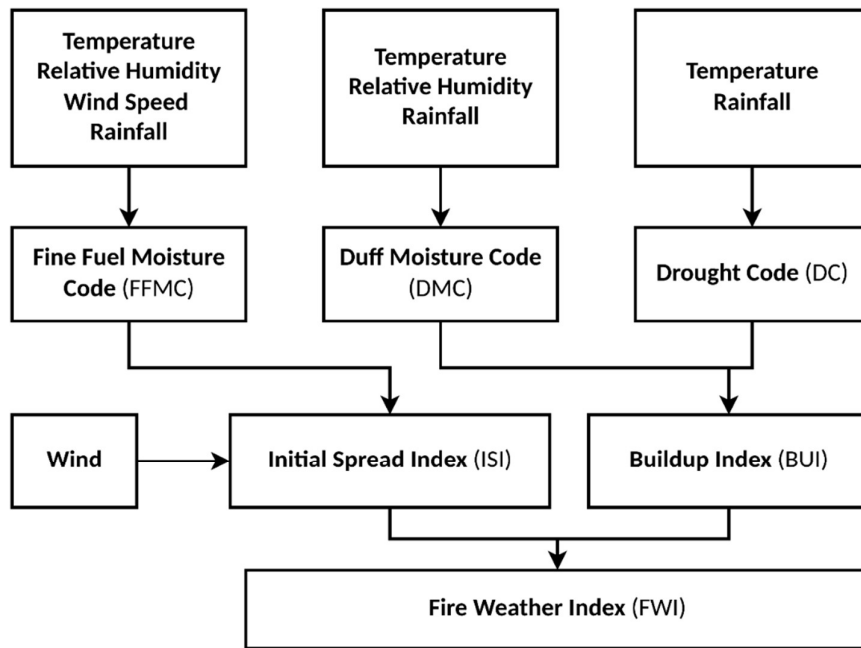

20

21 **Figure S3** The schematic represents the Canadian Fire Weather Index system for probable forest  
 22 fire danger rating (Lawson & Armitage, 2008).

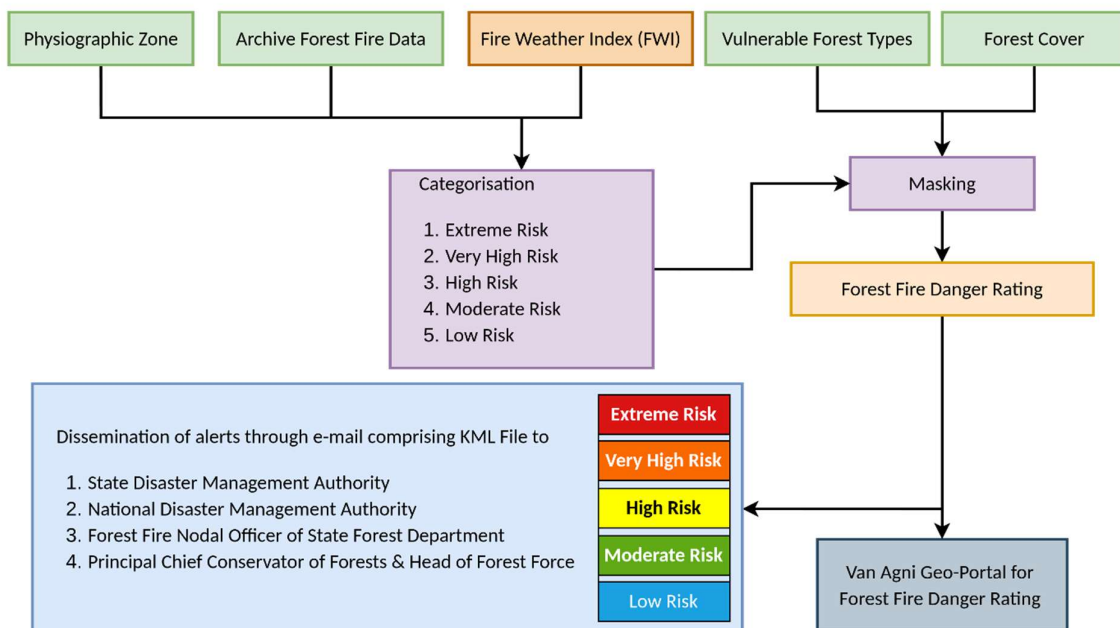

23

24 **Figure S4** Forest Fire Danger Rating System (FFDRS) and Pre-Fire Alert Dissemination System by  
 25 Forest Survey of India (Source: Forest Survey of India).

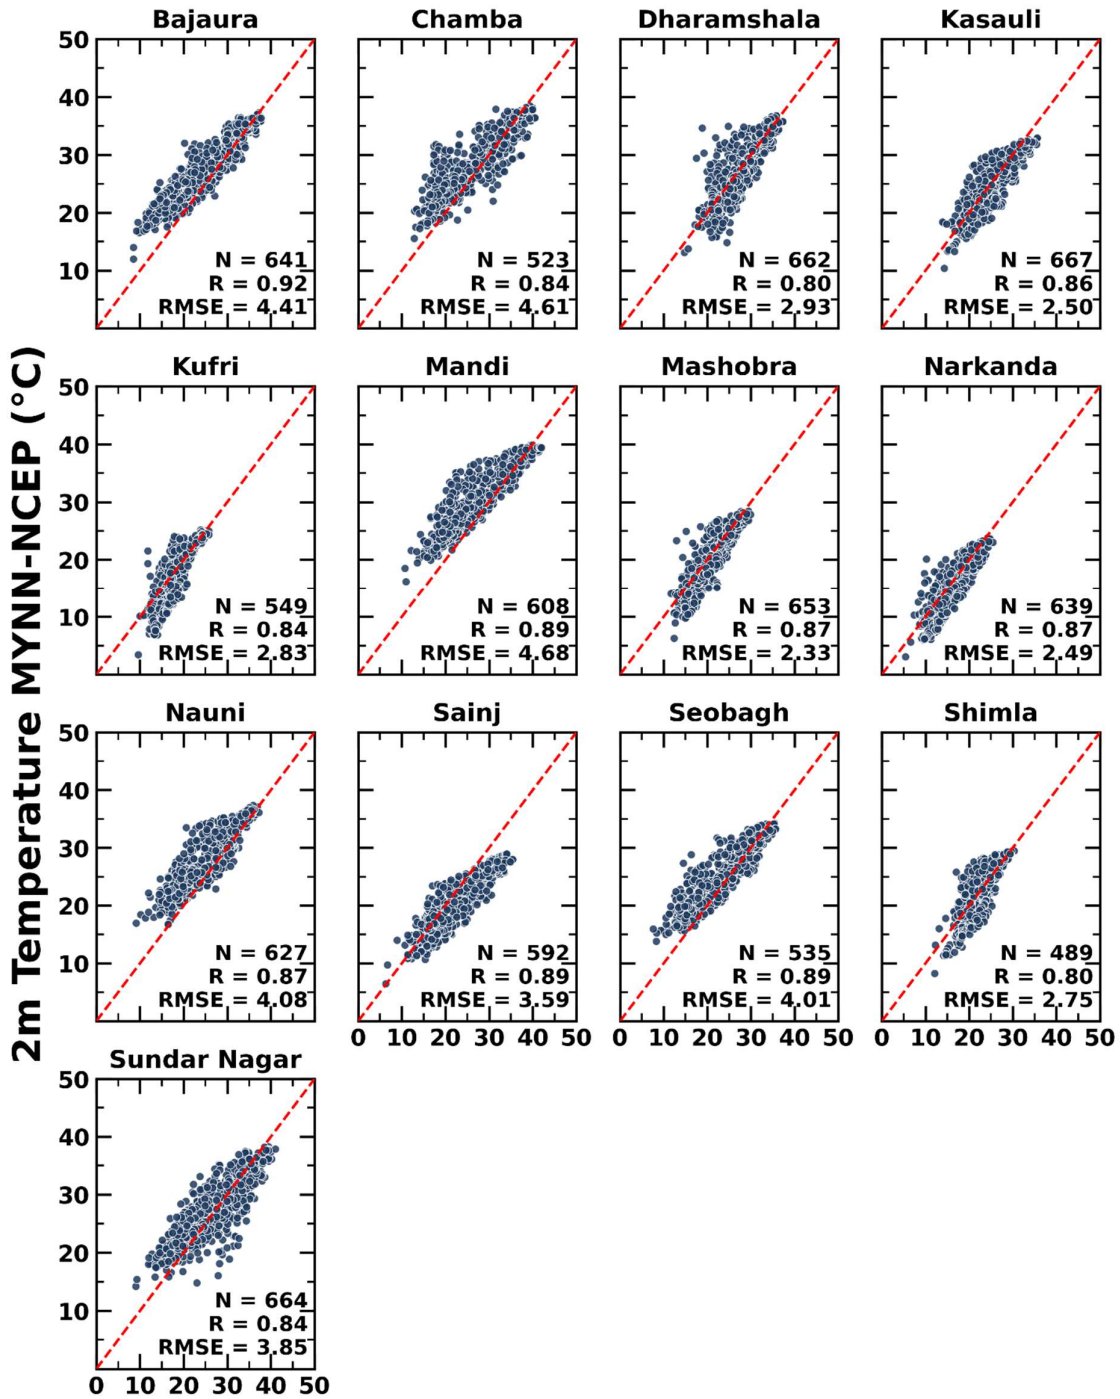

### 2m Temperature Observed (°C)

26

27 **Figure S5** This figure shows the validation of 2m temperature of MYNN<sub>NCEP</sub> simulation against the  
 28 India Meteorological Department Automated Weather Station data across Himachal Pradesh, India.

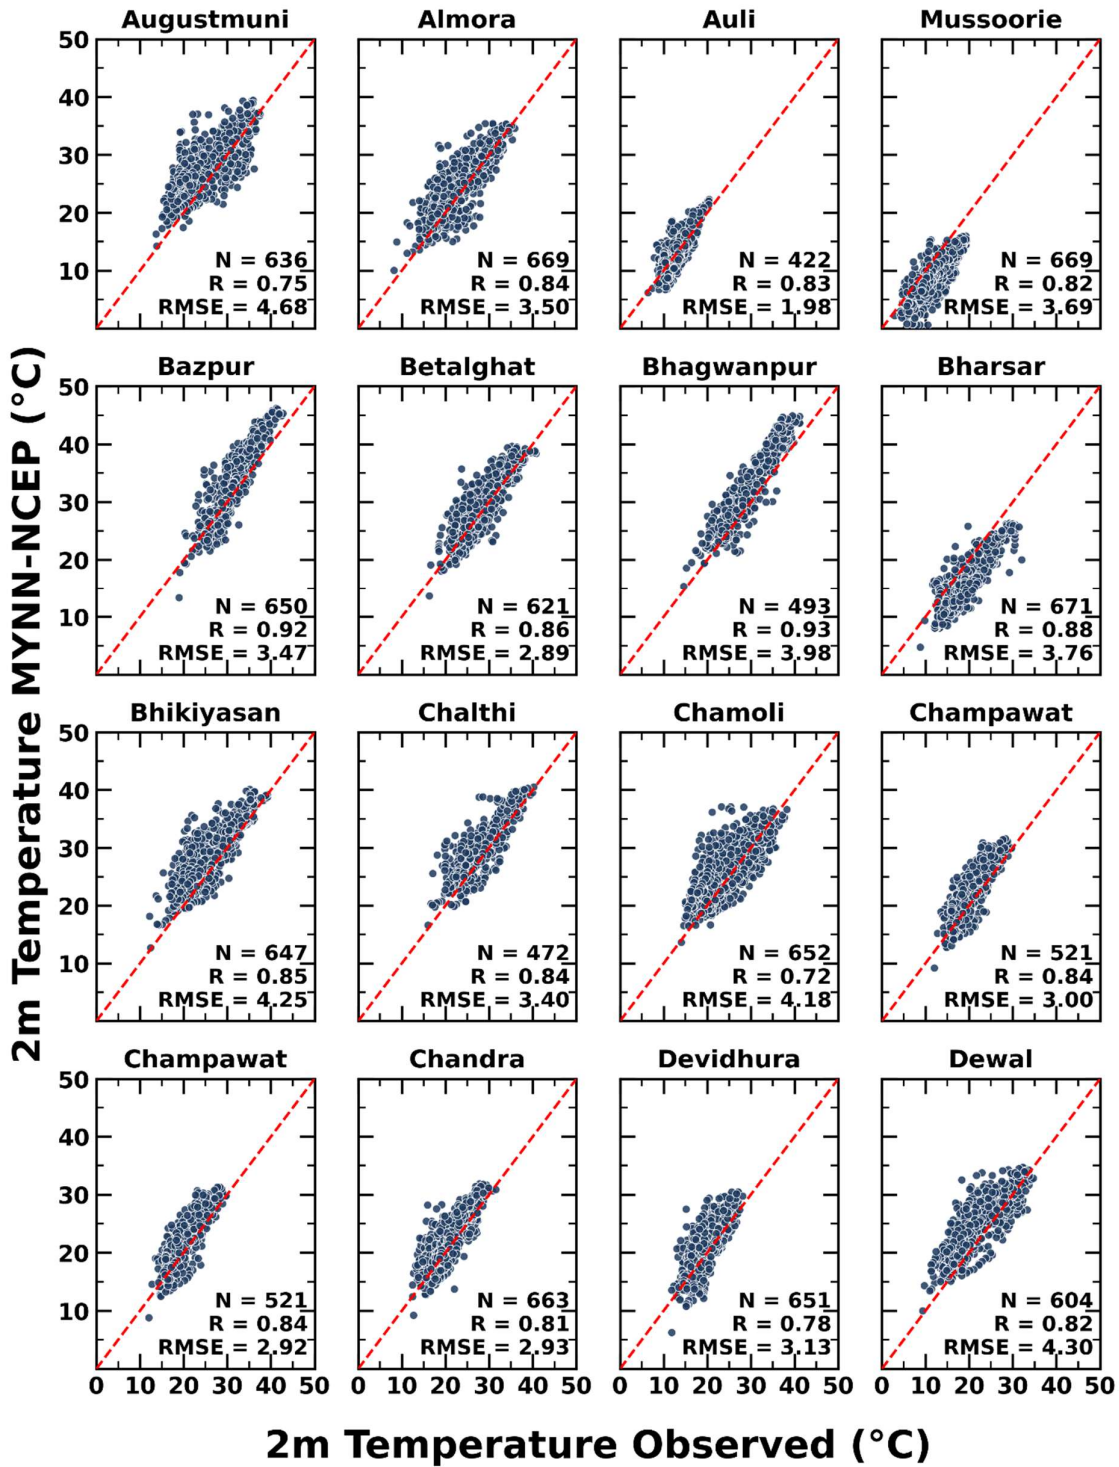

29

30 **Figure S6** This figure shows the validation of 2m temperature of MYNN<sub>NCEP</sub> simulation against the  
 31 India Meteorological Department Automated Weather Station data across Uttarakhand, India.

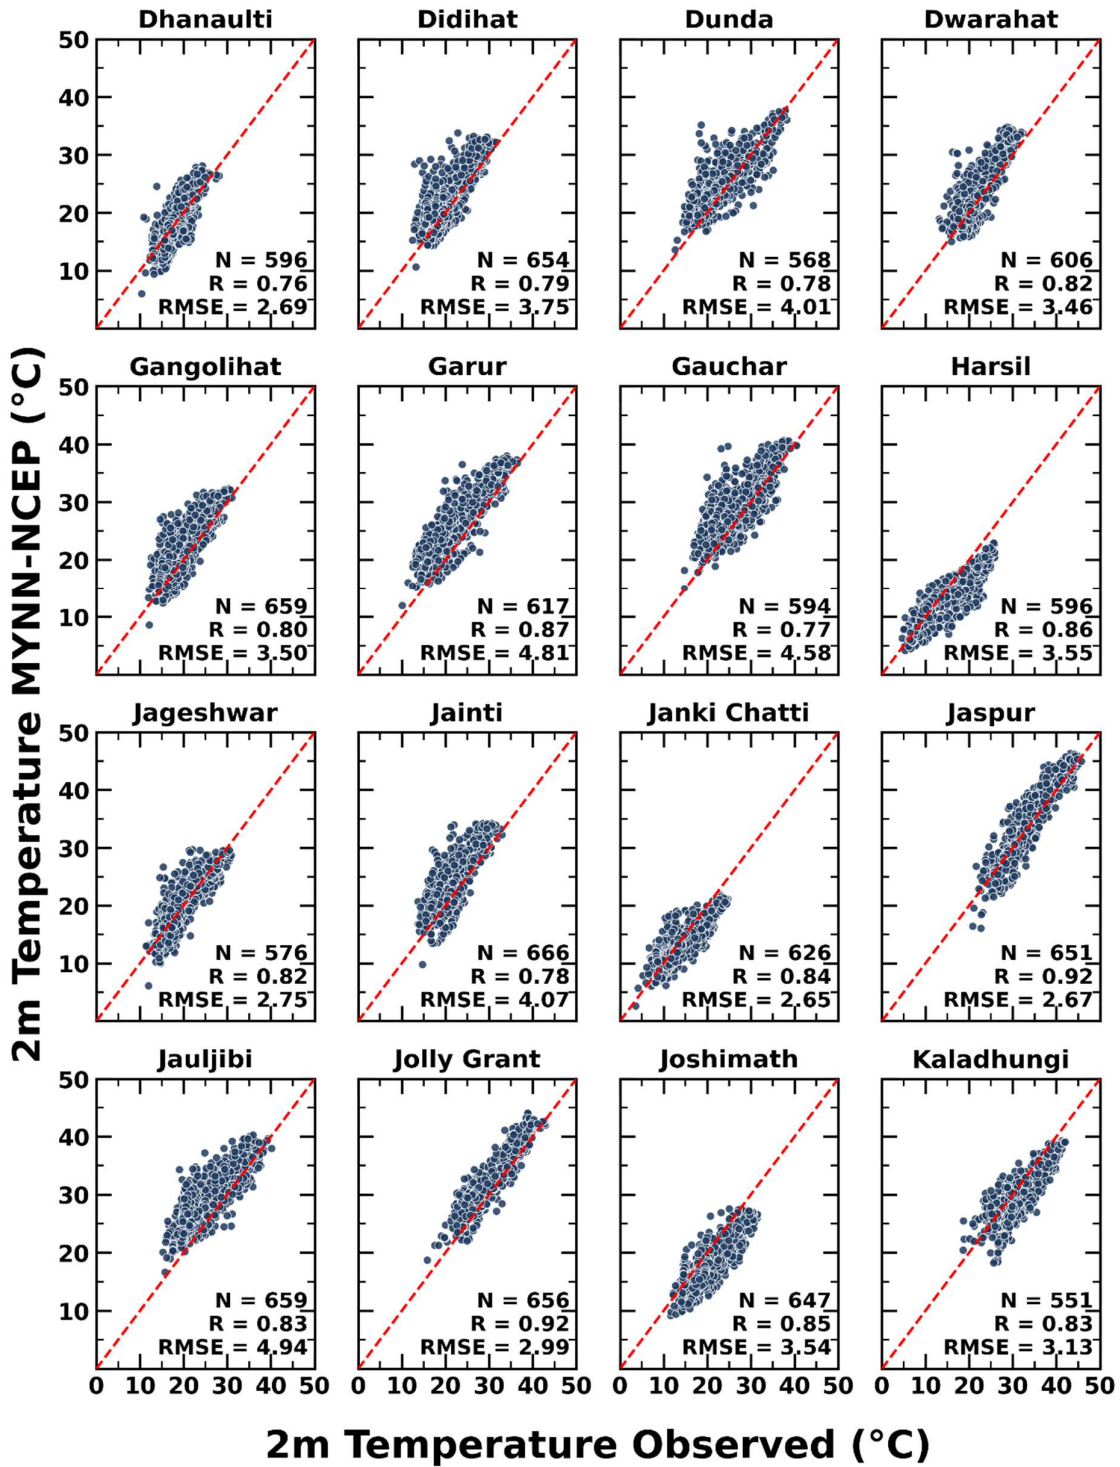

32

33 **Figure S7** This figure shows the validation of 2m temperature of MYNN<sub>NCEP</sub> simulation against the  
 34 India Meteorological Department Automated Weather Station data across Uttarakhand, India.

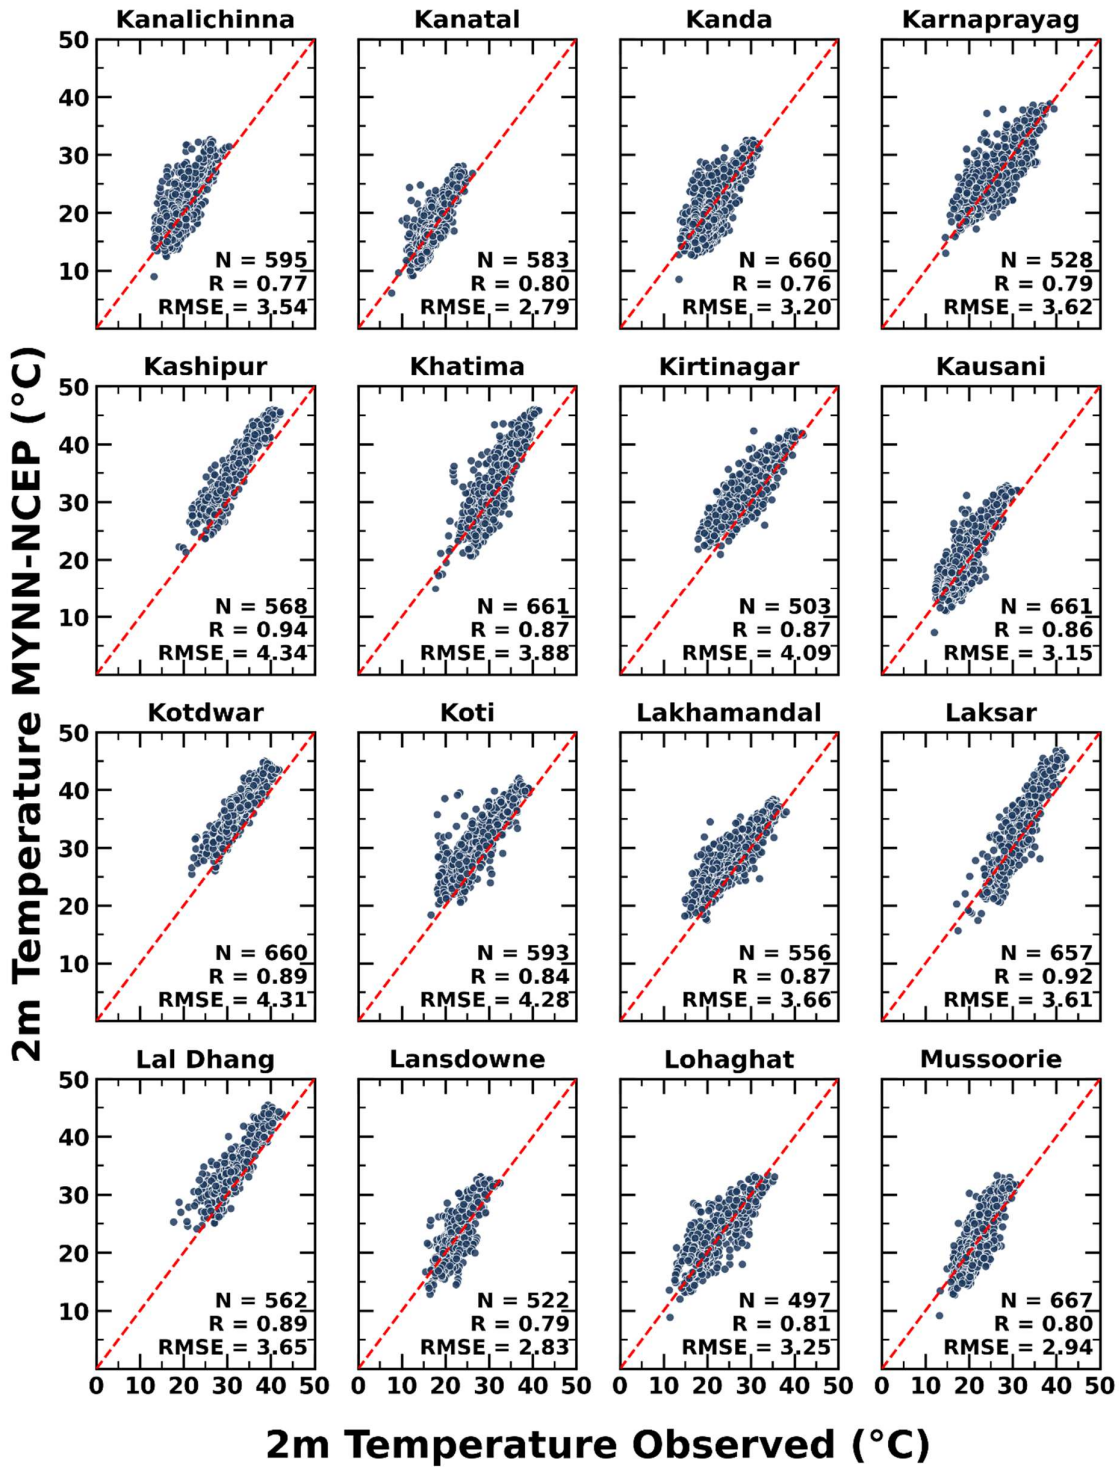

35

36 **Figure S8** This figure shows the validation of 2m temperature of MYNN<sub>NCEP</sub> simulation against the  
 37 India Meteorological Department Automated Weather Station data across Uttarakhand, India.

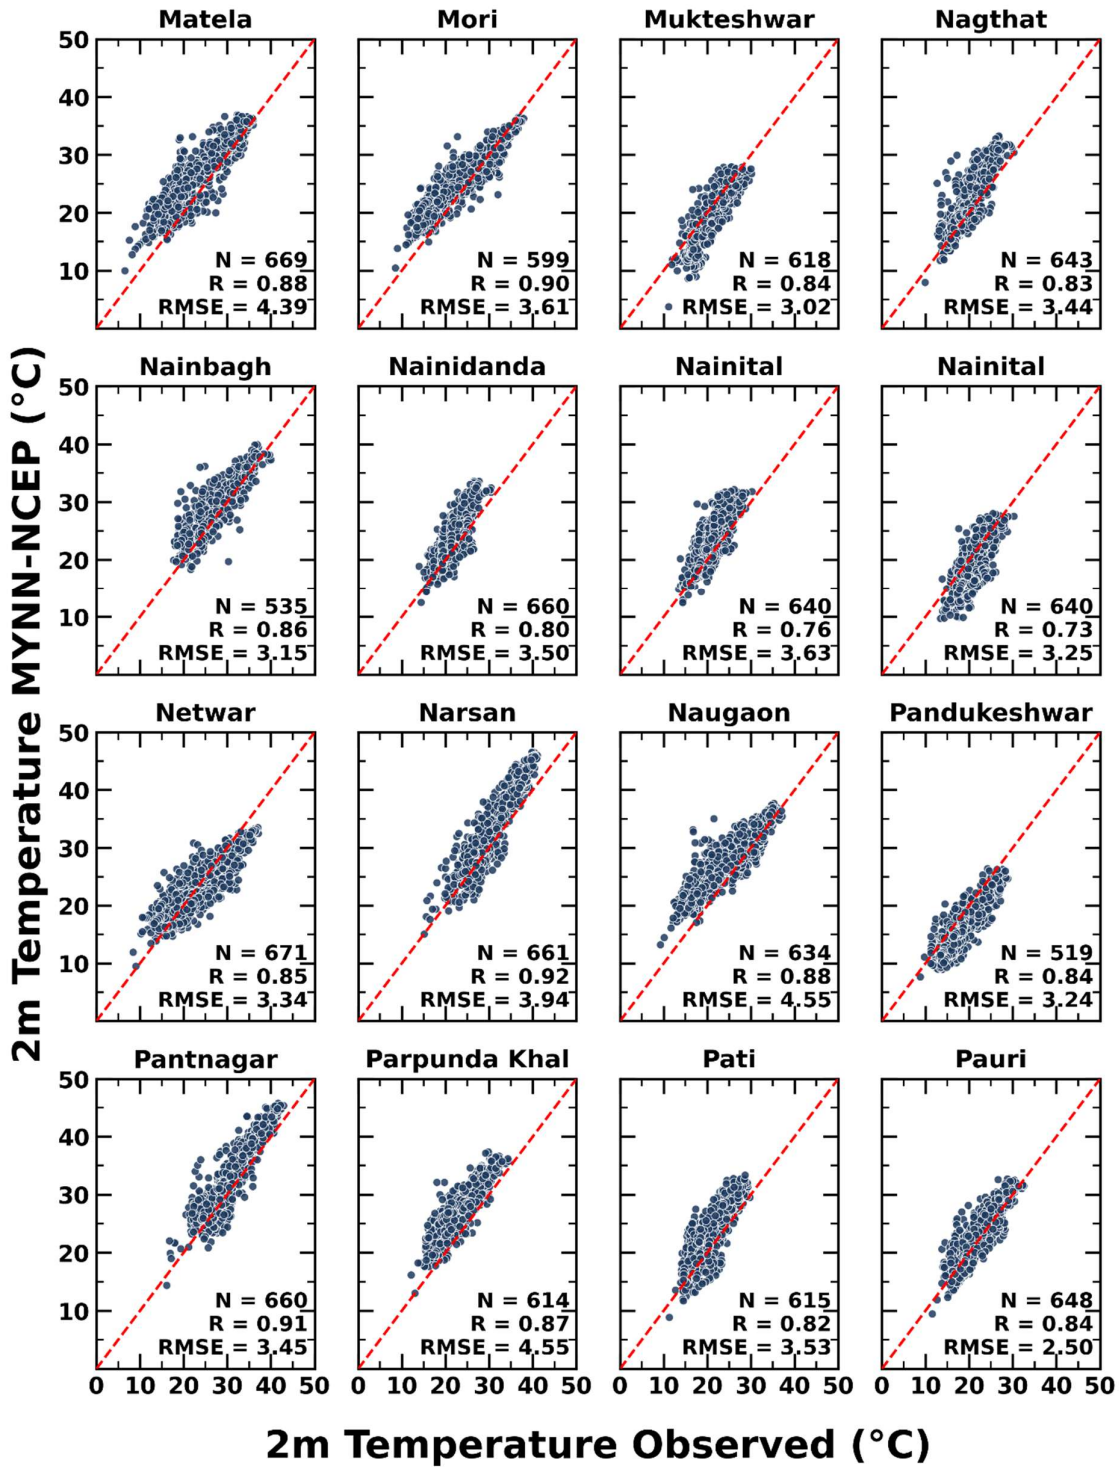

38

39 **Figure S9** This figure shows the validation of 2m temperature of MYNN<sub>NCEP</sub> simulation against the  
 40 India Meteorological Department Automated Weather Station data across Uttarakhand, India

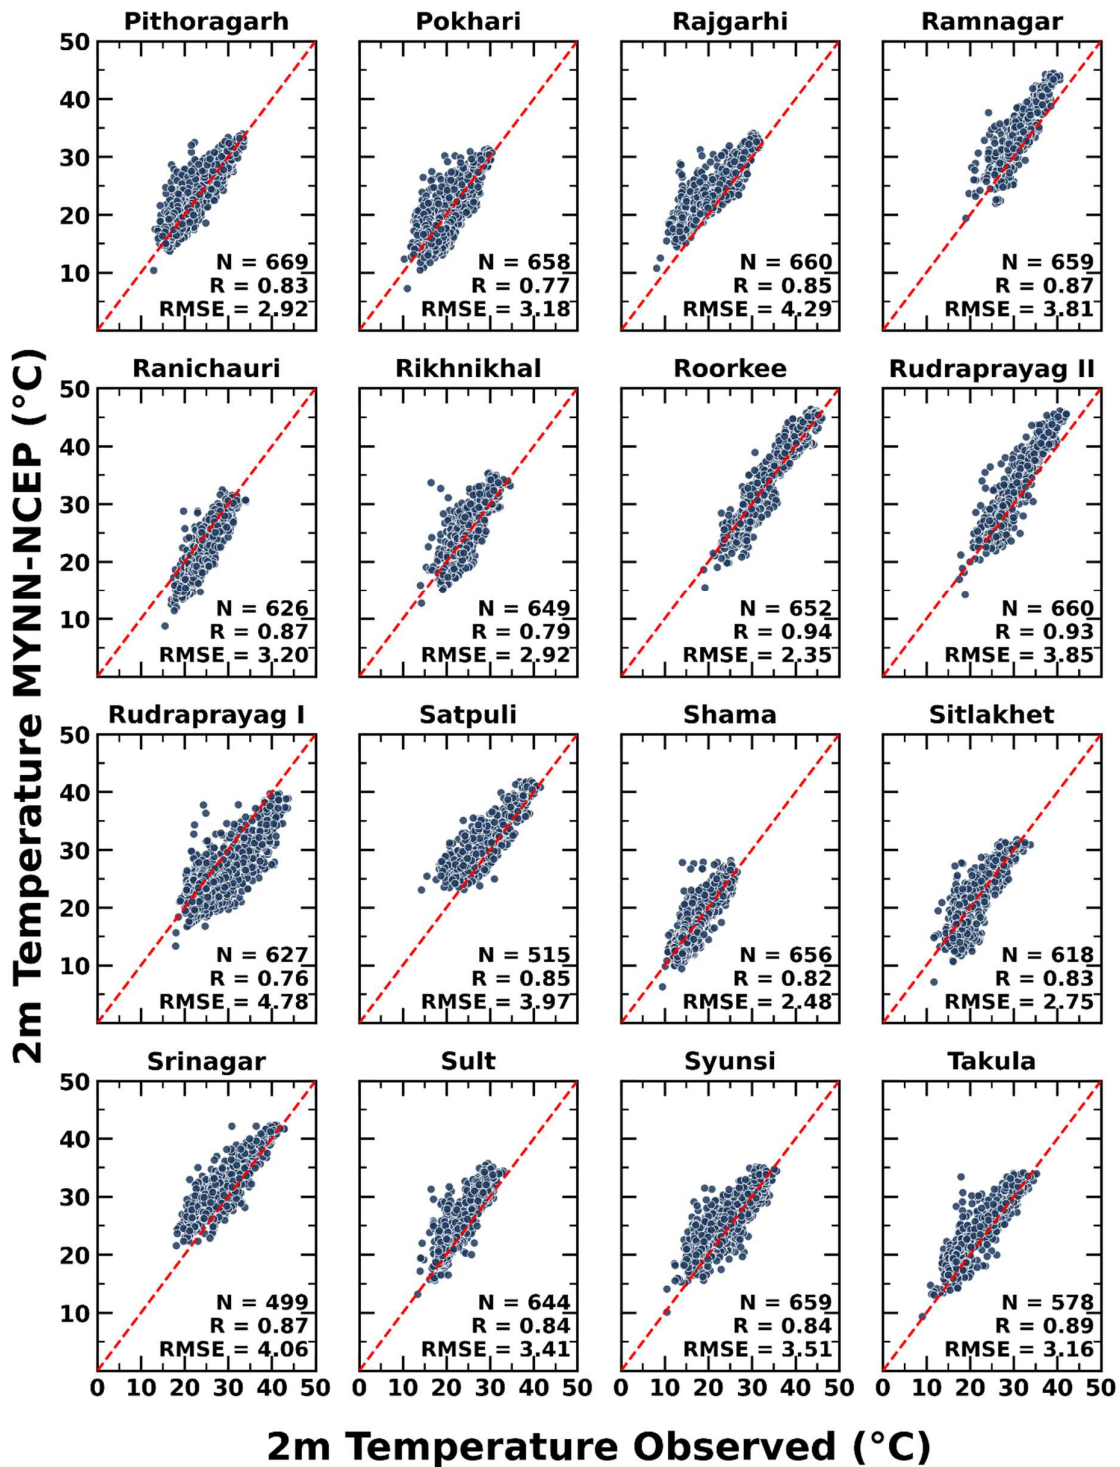

41

42 **Figure S10** This figure shows the validation of 2m temperature of MYNN<sub>NCEP</sub> simulation against the  
 43 India Meteorological Department Automated Weather Station data across Uttarakhand, India.

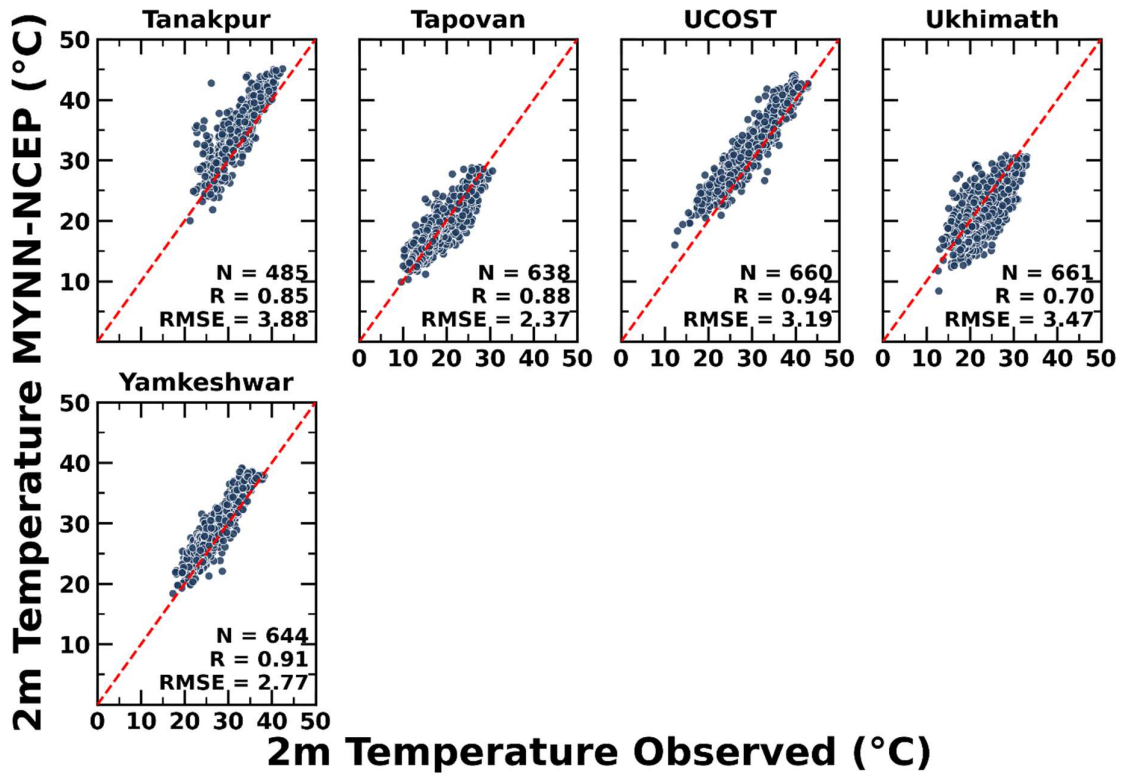

44

45 **Figure S11** This figure shows the validation of 2m temperature of MYNN<sub>NCEP</sub> simulation against the  
 46 India Meteorological Department Automated Weather Station data across Uttarakhand, India.

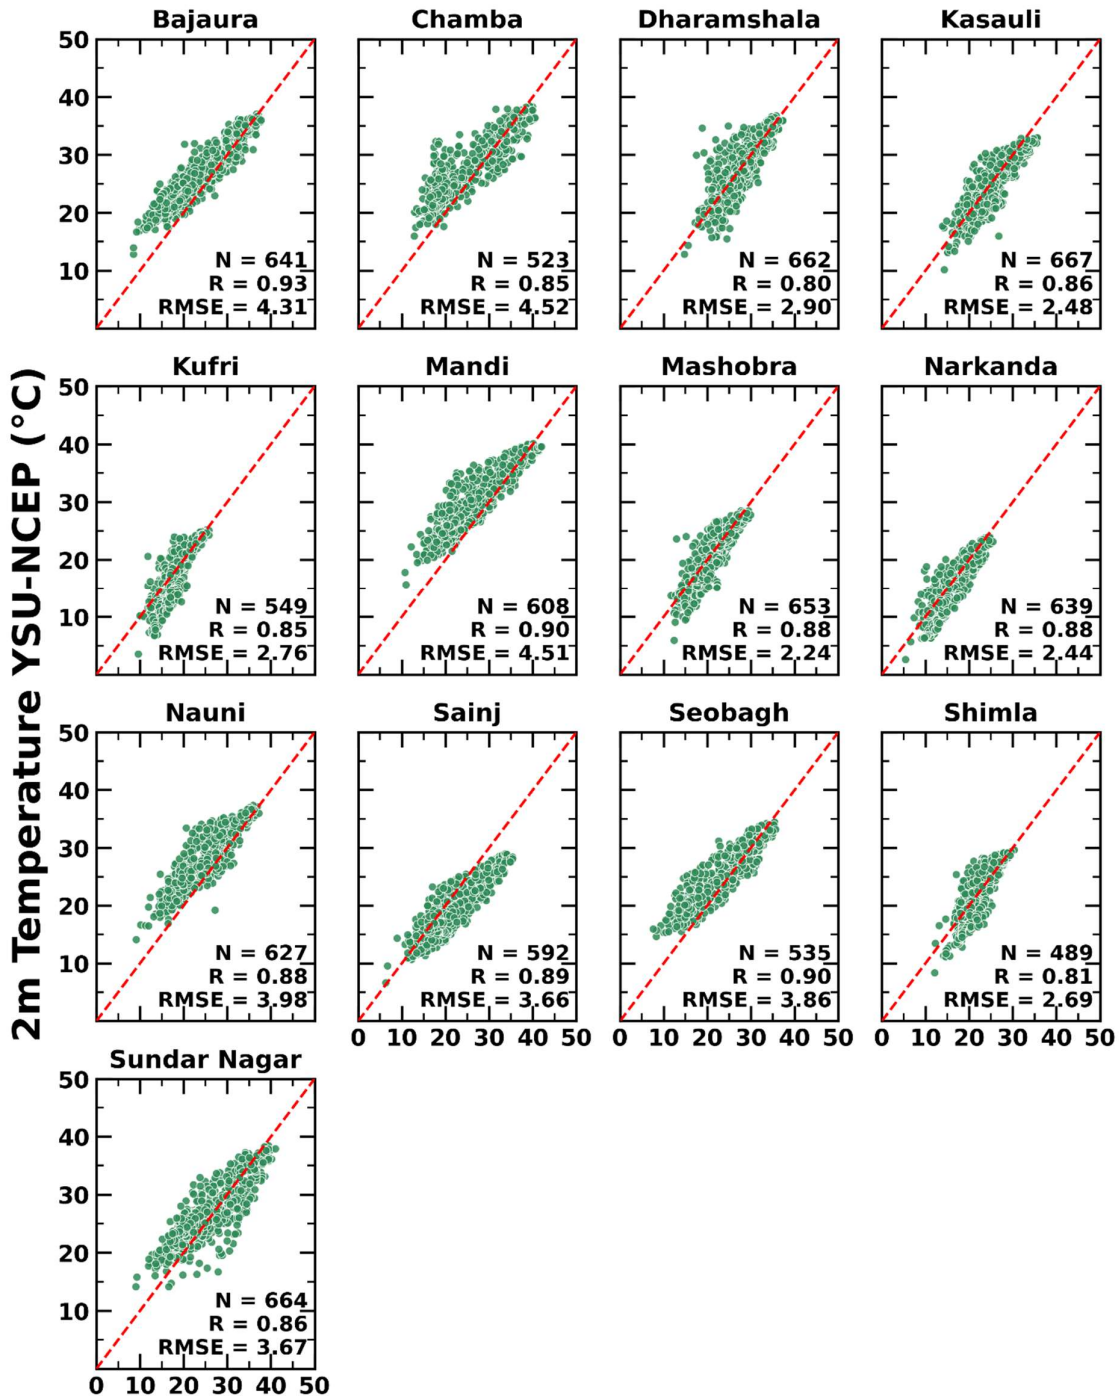

### 2m Temperature Observed (°C)

47

48 **Figure S12** This figure shows the validation of 2m temperature of YSU<sub>NCEP</sub> simulation against the  
 49 India Meteorological Department Automated Weather Station data across Himachal Pradesh, India.

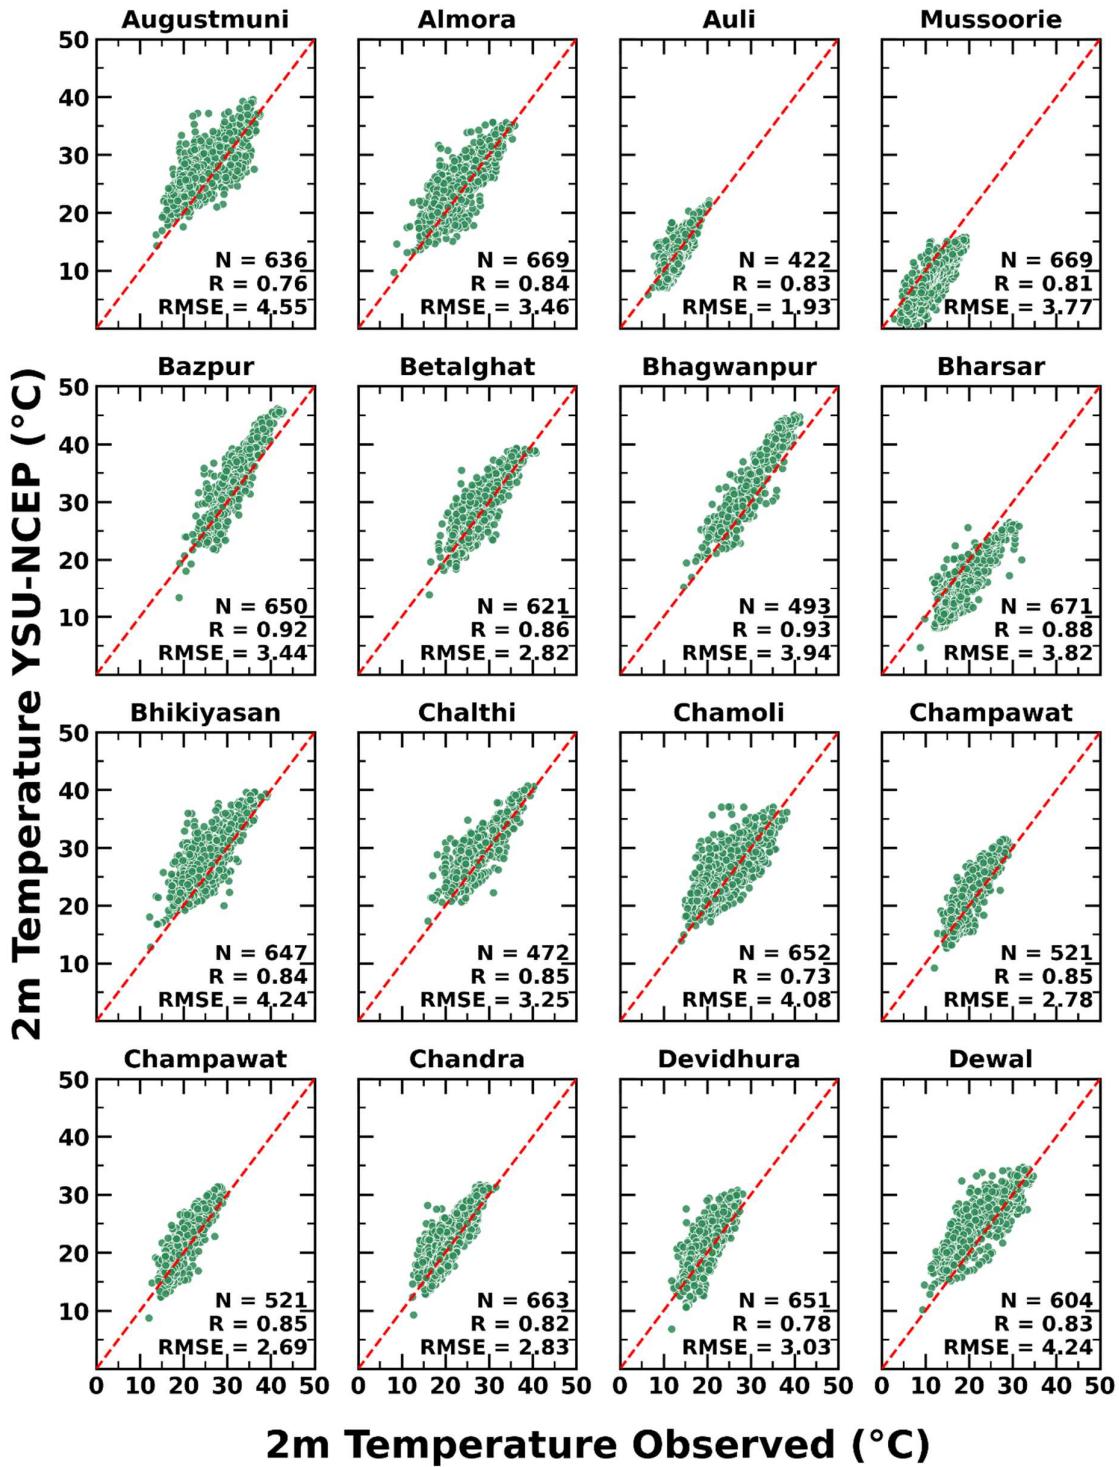

50

51 **Figure S13** This figure shows the validation of 2m temperature of YSU<sub>NCEP</sub> simulation against the  
 52 India Meteorological Department Automated Weather Station data across Uttarakhand, India.

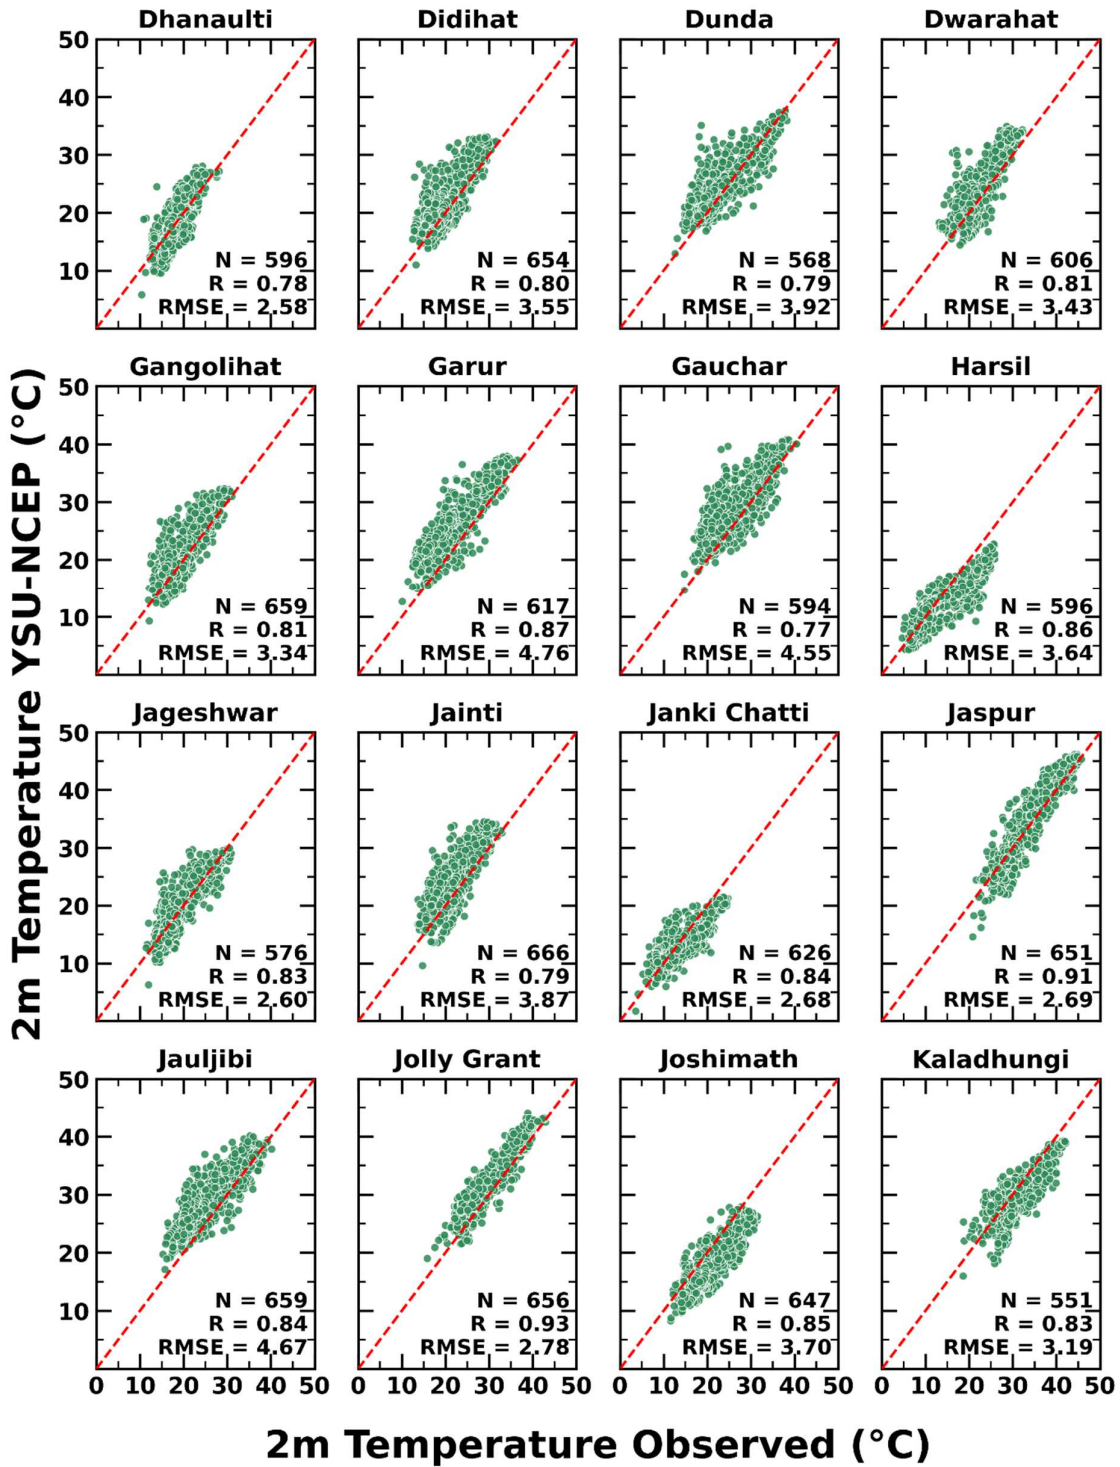

53

54 **Figure S14** This figure shows the validation of 2m temperature of YSU<sub>NCEP</sub> simulation against the  
 55 India Meteorological Department Automated Weather Station data across Uttarakhand, India.

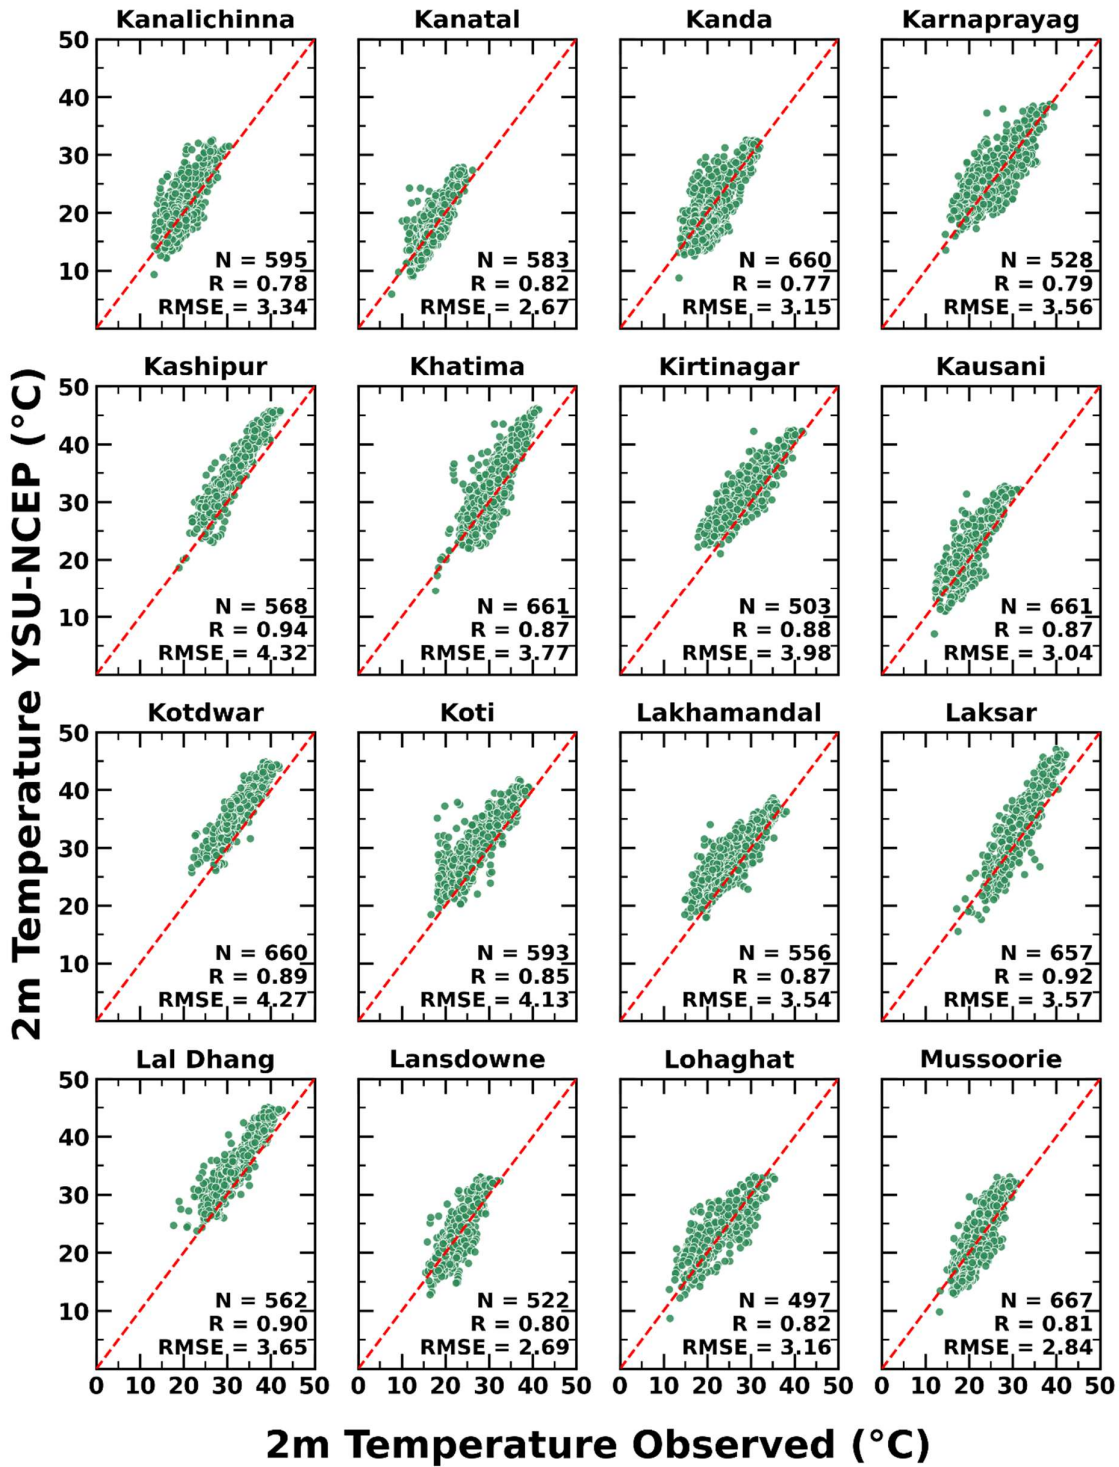

56

57 **Figure S15** This figure shows the validation of 2m temperature of YSU<sub>NCEP</sub> simulation against the  
 58 India Meteorological Department Automated Weather Station data across Uttarakhand, India.

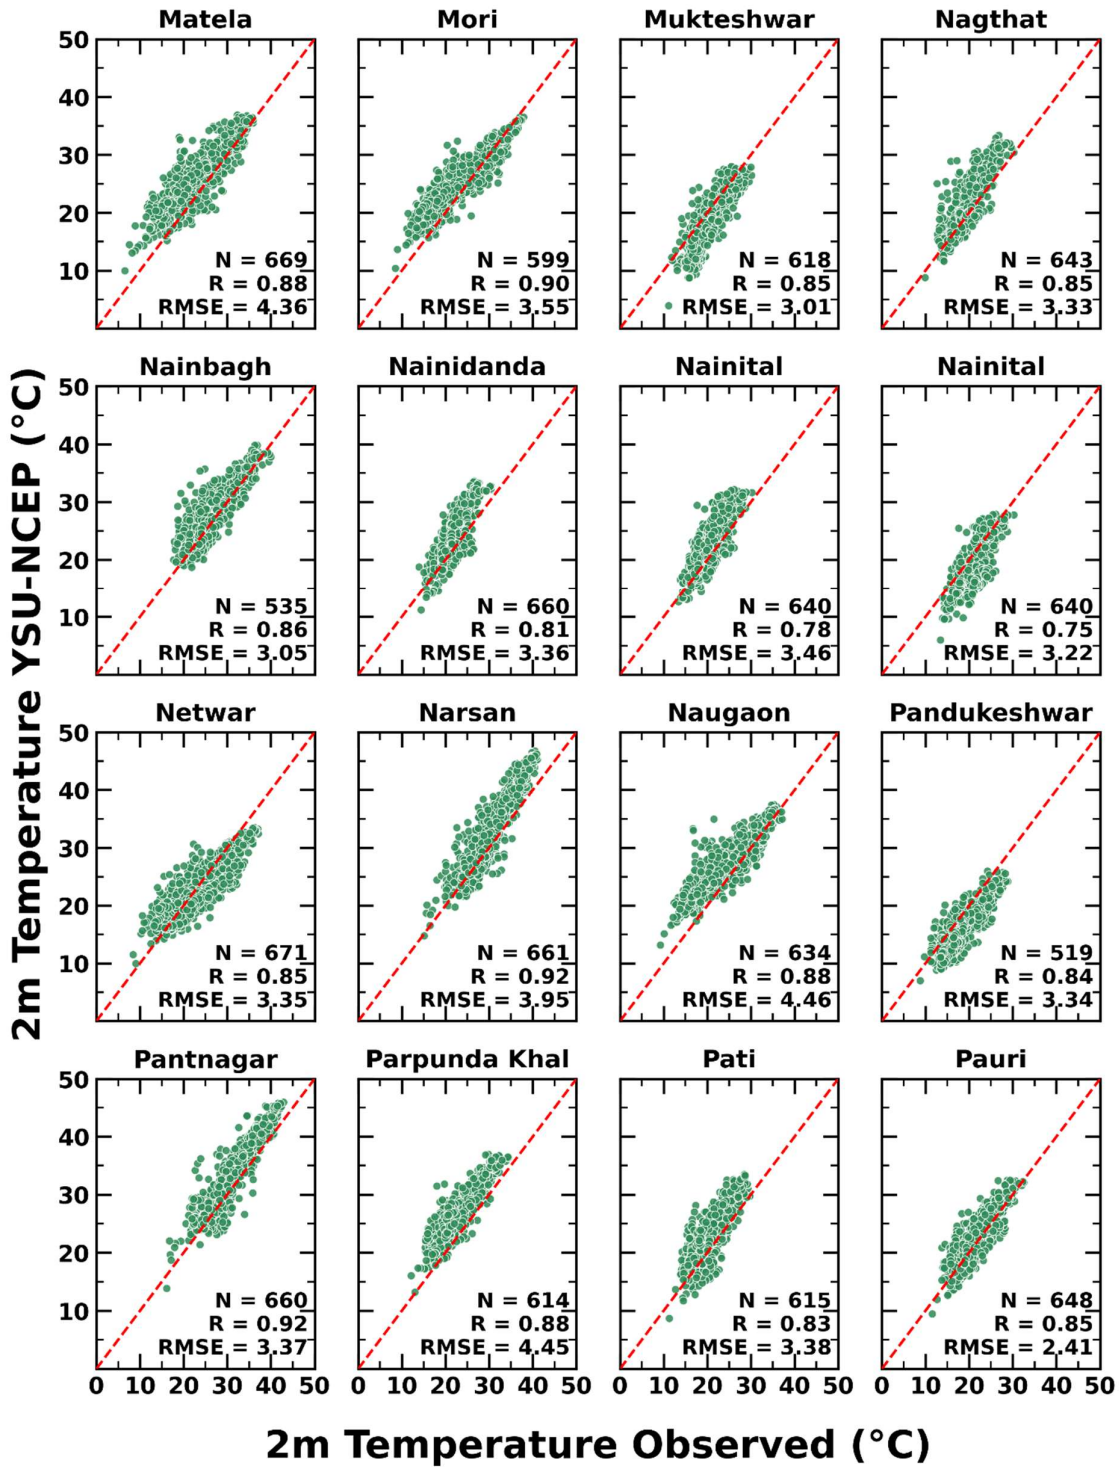

59

60 **Figure S16** This figure shows the validation of 2m temperature of YSU<sub>NCEP</sub> simulation against the  
 61 India Meteorological Department Automated Weather Station data across Uttarakhand, India.

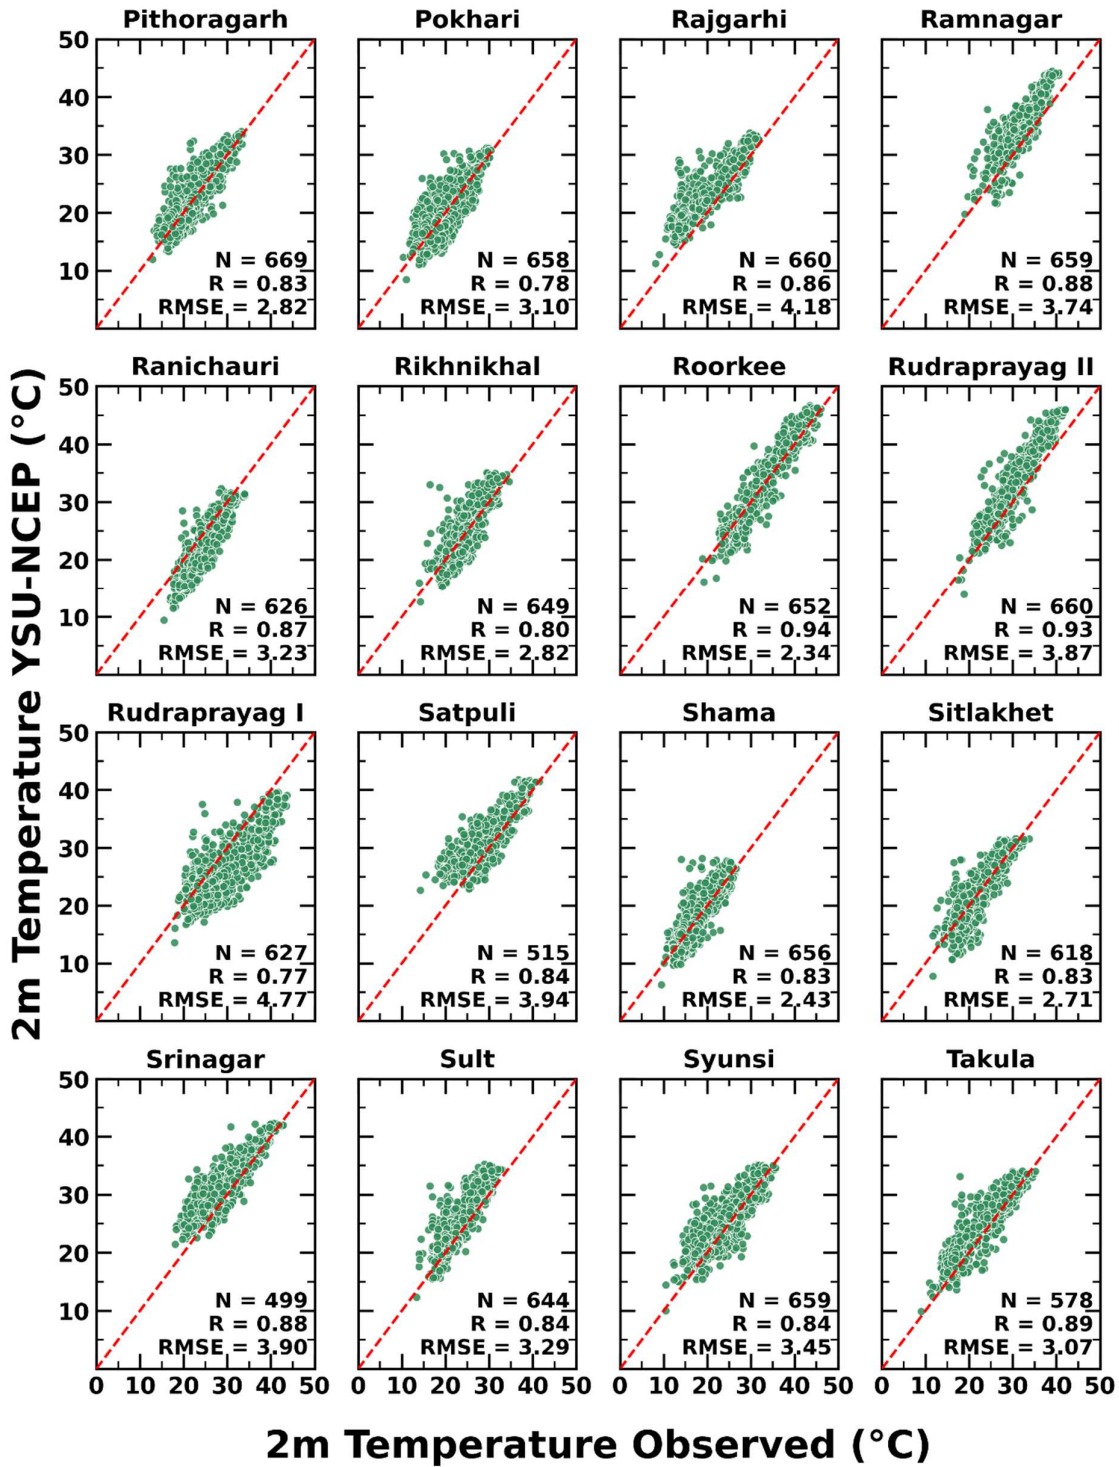

62

63 **Figure S17** This figure shows the validation of 2m temperature of YSU<sub>NCEP</sub> simulation against the  
 64 India Meteorological Department Automated Weather Station data across Uttarakhand, India.

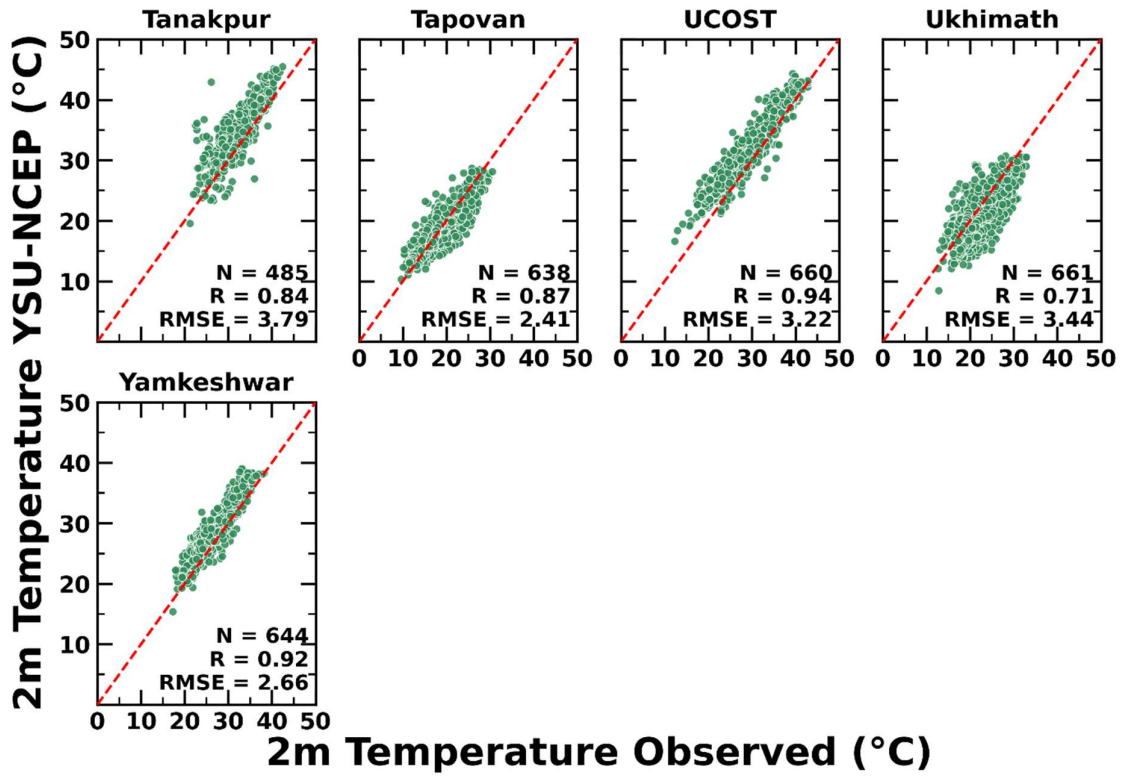

65

66 **Figure S18** This figure shows the validation of 2m temperature of YSU<sub>NCEP</sub> simulation against the  
 67 India Meteorological Department Automated Weather Station data across Uttarakhand, India.

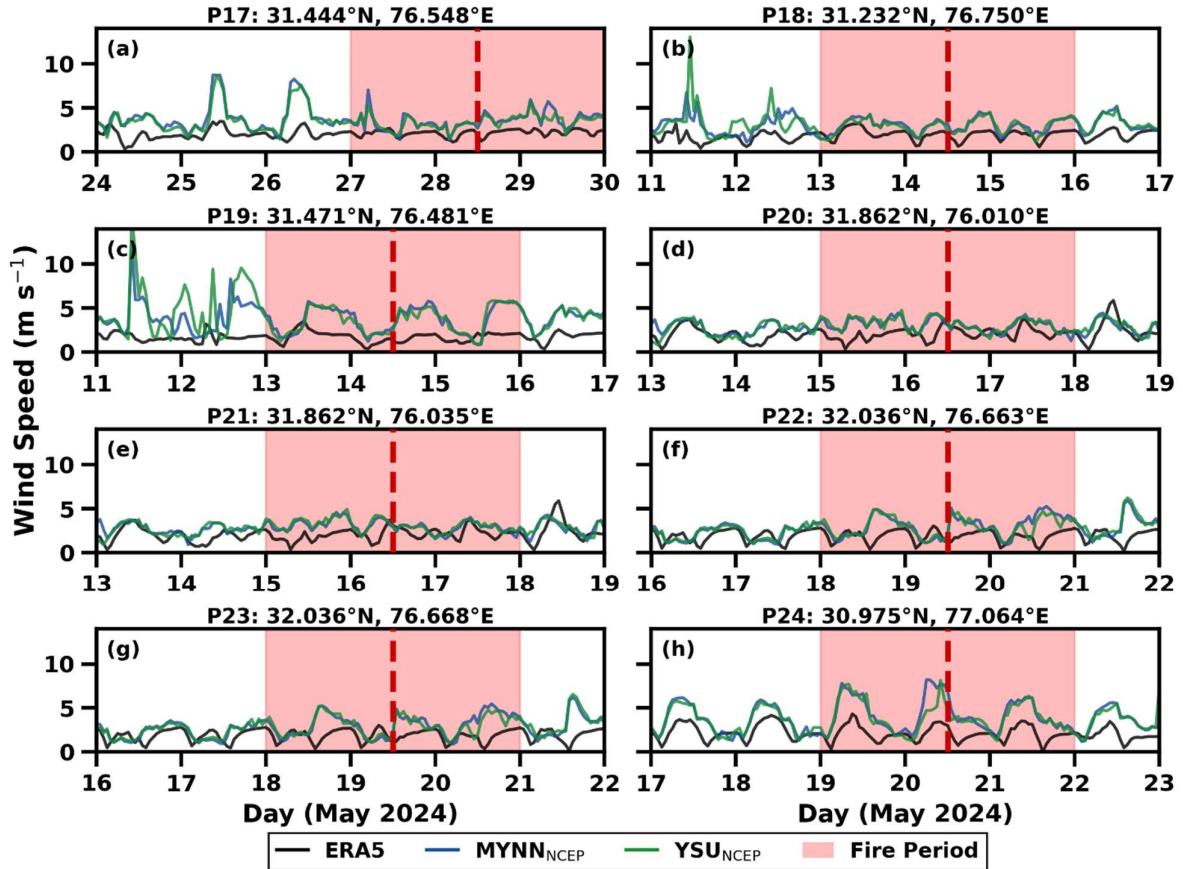

68

69 **Figure S19** This figure shows the variation in wind speed (in m/s) across the 08 major fire clusters  
 70 identified across Himachal Pradesh, India. The red shaded region represents the fire period window,  
 71 with the dotted line representing fire detection by the satellite sensors. ERA5 - Land reference,  
 72 MYNN, and YSU simulations are represented in the respective plots.

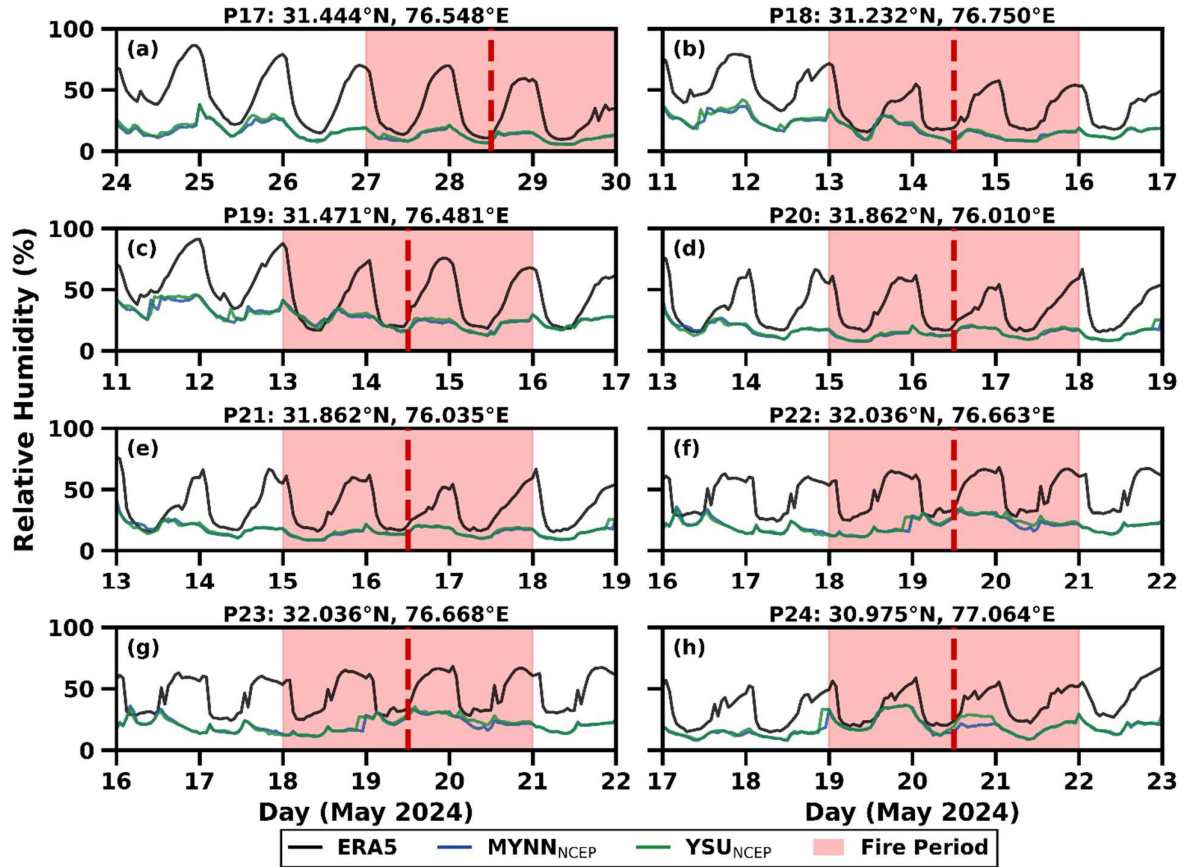

73

74 **Figure S20** This figure shows the variation in relative humidity (in %) across the 08 major fire  
 75 clusters identified across Himachal Pradesh, India. The red shaded region represents the fire period  
 76 window, with the dotted line representing fire detection by the satellite sensors. ERA5 – Land  
 77 reference, MYNN, and YSU simulations are represented in the respective plots.

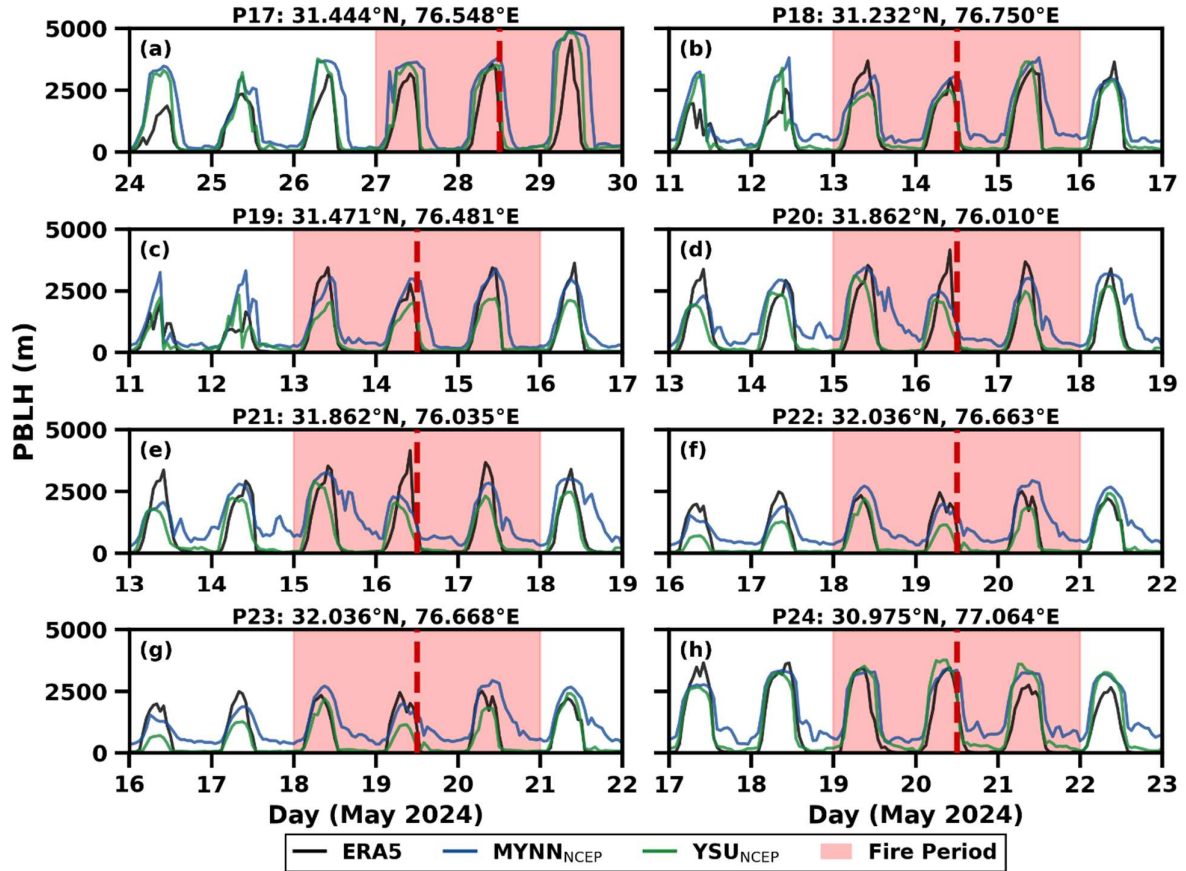

78

79 **Figure S21** This figure shows the variation in planetary boundary layer height (in m) across the 08  
 80 major fire clusters identified across Himachal Pradesh, India. The red shaded region represents the  
 81 fire period window, with the dotted line representing fire detection by the satellite sensors. ERA5 -  
 82 Land reference, MYNN, and YSU simulations are represented in the respective plots.

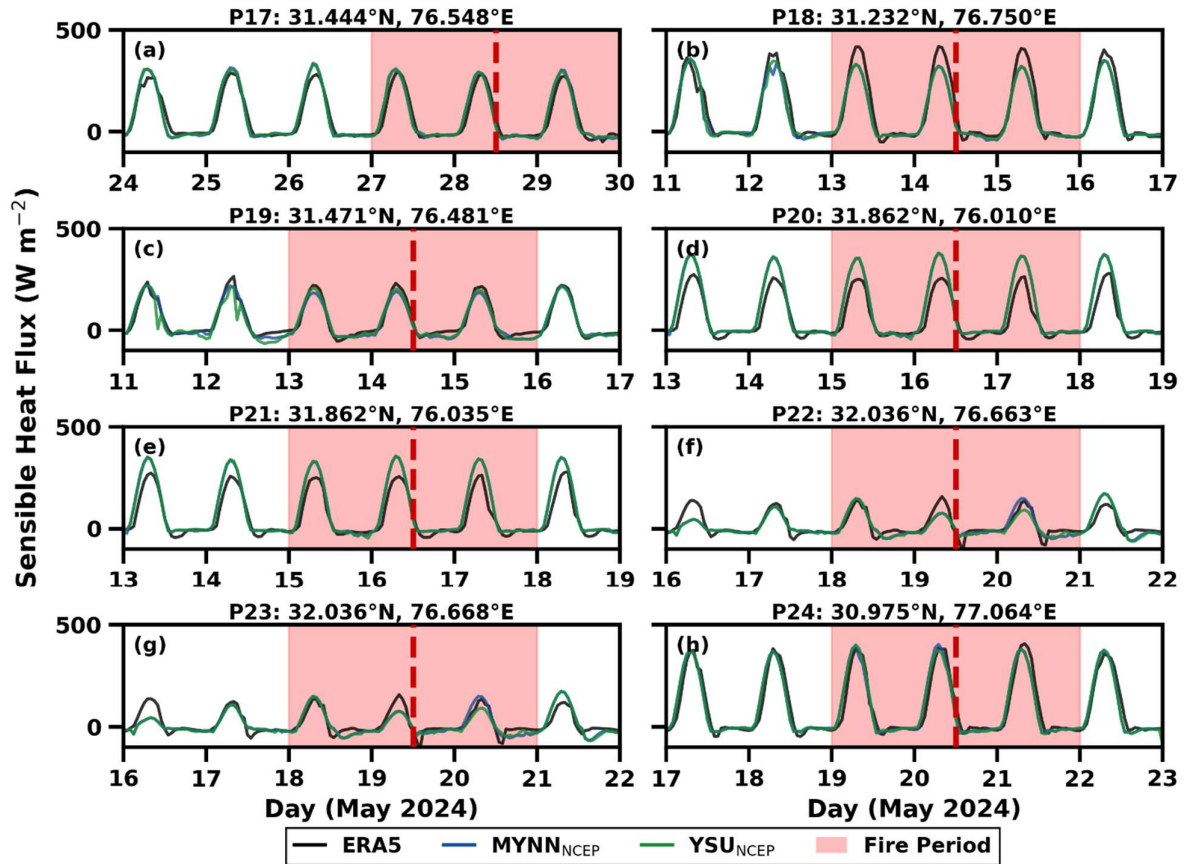

83

84 **Figure S22** This figure shows the variation in sensible heat flux (in  $W/m^2$ ) across the 08 major fire  
 85 clusters identified across Himachal Pradesh, India. The red shaded region represents the fire period  
 86 window, with the dotted line representing fire detection by the satellite sensors. ERA5 - Land  
 87 reference, MYNN, and YSU simulations are represented in the respective plots.

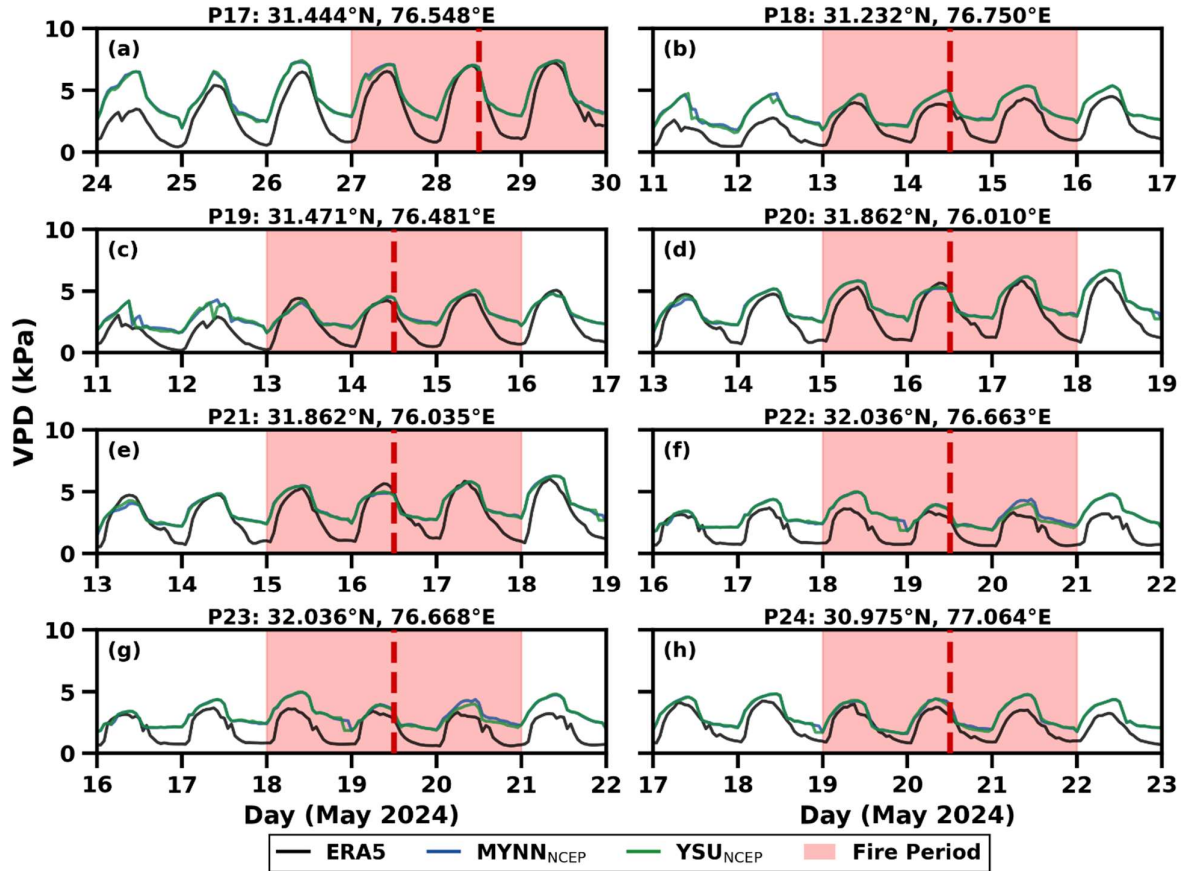

88

89 **Figure S23** This plot shows the variation in vapour pressure deficit (in kPa) across 08 major fire  
 90 clusters identified across Himachal Pradesh, India. The red shaded region represents the fire period  
 91 window, with the dotted line representing fire detection by the satellite sensors. ERA5 – Land VPD,  
 92 MYNN, and YSU simulated VPD are represented in the respective plots.

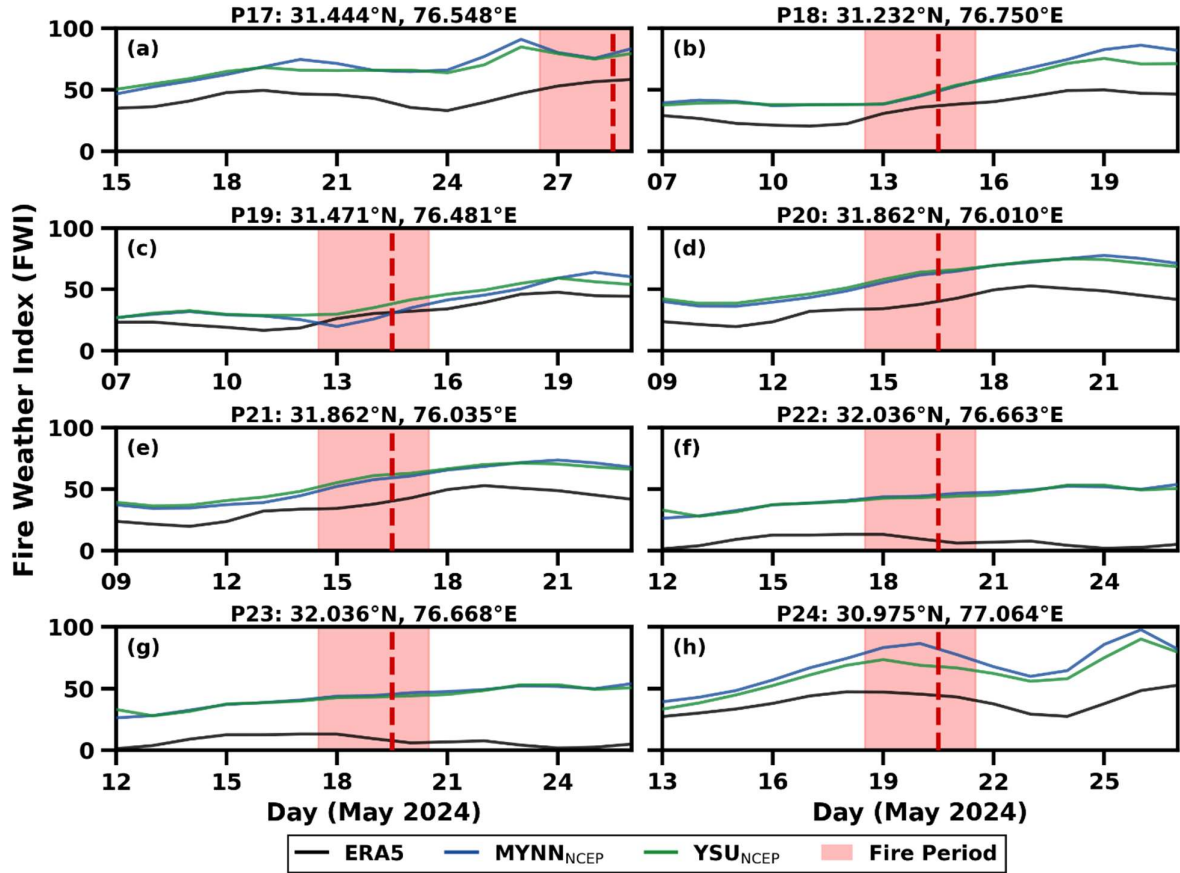

93

94 **Figure S24** This figure shows the variation in the Fire Weather Index across 08 major fire clusters  
 95 identified across Himachal Pradesh, India. The red shaded region represents the fire period window,  
 96 with the dotted line representing fire detection by the satellite sensors. ERA5 – Land FWI, MYNN,  
 97 and YSU simulated FWI are represented in the respective plots.
